# Supplementary material for: Genome and Transcriptome Sequences Reveal the Specific Parasitism of the Nematophagous Purpureocillium lilacinum 36-1
Source: PubMed Central journal article supplement (PMC4949223; doi:10.3389/fmicb.2016.01084), 2016-07-19
Supplement: Image1.pdf [file Image1.pdf]

## Supplementary figure 1

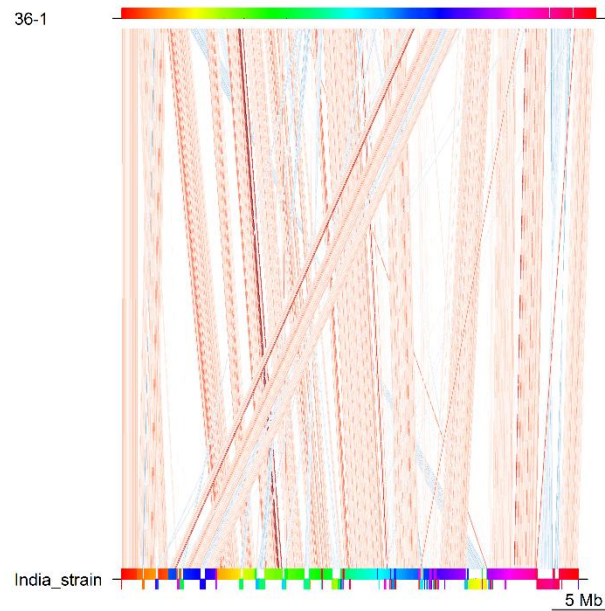

**Fig. S1: The whole genome alignment between *P. lilacinum* 36-1 and the India\_strain.** The line indicates the locally collinear blocks (LCB) (>100 bp). Red lines indicate forward alignments. Blue lines indicate reverse alignments.
