# Supplementary material for: Genome and Transcriptome Sequences Reveal the Specific Parasitism of the Nematophagous Purpureocillium lilacinum 36-1
Source: PubMed Central journal article supplement (PMC4949223; doi:10.3389/fmicb.2016.01084), 2016-07-19
Supplement: Image4.pdf [file Image4.pdf]

## Supplementary figure 4

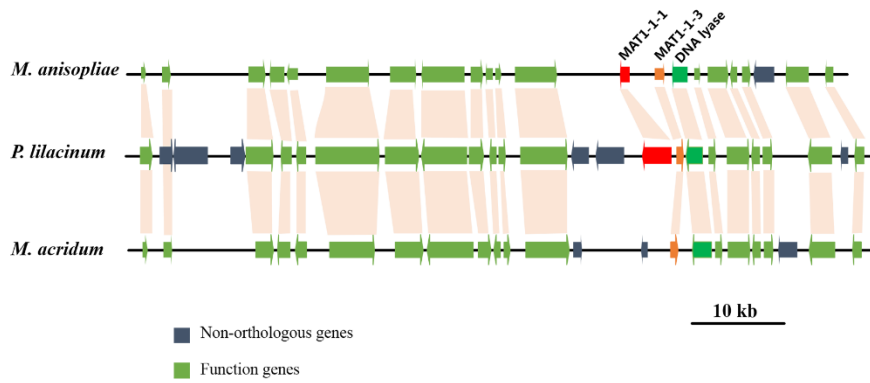

**Fig. S4: Collinearity analysis of sexual differentiation gene cluster in *P. lilacinum* 36-1 and *Metarhizium* spp..**
