# Supplementary material for: Genome and Transcriptome Sequences Reveal the Specific Parasitism of the Nematophagous Purpureocillium lilacinum 36-1
Source: Front Microbiol. 2016 Jul 19;7:1084. doi: 10.3389/fmicb.2016.01084 (PMC4949223; doi:10.3389/fmicb.2016.01084)
Supplement: Supplementary file 8 [file Table8.XLSX]

## Sheet: Table S8
Table S8: Tansporter genes up-regulated (log2 fold change > 2) during nematode-eggs infection
Gene id	Family	GFOLD.0.01	E.FDR	log2fdc	RPKM_water	RPKM_eggs	Identity	E-value	Score
PCL_09759	2.A.1.9.2	10.1341	1	11.0027	0.255309	1465.67	76.02	0	836
PCL_02581	2.A.20.2.1	6.18852	1	8.92272	0	25.1787	37.02	7e-105	375
PCL_02549	2.A.3.10.4	7.21689	1	7.9645	0.221875	152.66	42.89	4e-124	440
PCL_11896	2.A.1.2.17	4.95598	1	7.69473	0	11.8069	32.84	3e-75	277
PCL_02592	2.A.17.2.1	6.19476	1	7.39914	0.164027	80.4256	31.1	2e-73	271
PCL_04472	2.A.1.12.2	5.86031	1	7.37297	0.0729453	41.6138	30.63	4e-62	233
PCL_06298	2.A.17.2.1	6.17575	1	6.59219	0.609817	154.661	40.43	5e-107	384
PCL_13087	2.A.1.2.31	5.59186	1	6.40922	0.293682	69.4005	30.34	9e-57	216
PCL_10145	2.A.67.2.6	5.86106	1	6.1937	1.38394	264.488	23.7	2e-41	166
PCL_06890	2.A.1.14.11	3.41114	1	6.16483	0	4.76967	30.55	2e-69	258
PCL_09411	2.A.17.2.2	5.70636	1	6.04992	1.7342	300.217	46.47	2e-138	487
PCL_02919	2.A.1.9.4	5.82318	1	6.03169	3.09352	524.836	28.39	1e-40	163
PCL_01482	2.A.1.16.2	4.36465	1	5.88386	0.061207	12.425	24.32	8e-33	136
PCL_06467	2.A.1.3.27	5.62369	1	5.88325	3.27646	502.703	27.82	5e-49	190
PCL_13006	2.A.1.2.35	5.21507	1	5.71289	0.457954	63.6573	41.54	1e-104	376
PCL_07976	2.A.1.2.16	5.47032	1	5.71265	1.59686	217.49	34.2	2e-76	282
PCL_04561	2.A.67.1.2	5.30785	1	5.68943	1.04957	141.928	42.15	0	640
PCL_05646	2.A.1.1.38	2.90321	1	5.66638	0	3.1334	35.1	2e-85	311
PCL_05385	2.A.18.4.2	5.285	1	5.5666	0.994002	122.597	31.05	1e-51	200
PCL_11679	2.A.1.2.45	4.8948	1	5.48448	0.495476	59.4758	32.47	7e-72	266
PCL_08901	2.A.20.2.1	2.68907	1	5.45729	0	2.10384	62.98	0	781
PCL_11982	2.A.3.4.1	3.70105	1	5.45065	0.0100771	2.26593	32.02	4e-76	281
PCL_03381	2.A.1.1.33	4.83761	1	5.36858	0.50683	55.7039	53.81	3e-138	487
PCL_11698	2.A.1.3.35	3.71752	1	5.34254	0.0446141	6.98984	27.43	7e-47	183
PCL_05578	3.A.1.205.4	5.05218	1	5.29887	1.44107	147.358	48.21	0	1431
PCL_09567	2.A.1.3.27	3.66337	1	5.28901	0.0434441	6.5578	29.59	2e-49	191
PCL_10585	2.A.1.1.58	4.81375	1	5.26236	1.03005	104.215	54.97	1e-158	555
PCL_04475	2.A.67.1.4	3.69534	1	5.22048	0.0424545	5.43611	38.16	2e-165	577
PCL_05512	2.A.72.3.2	3.64287	1	5.08485	0.0549172	6.00284	50.33	0	757
PCL_09660	2.A.1.3.35	4.62149	1	5.07051	0.968183	85.7553	32.62	8e-57	216
PCL_02624	3.A.1.205.1	4.59384	1	5.01585	0.447529	38.0671	45.45	0	1270
PCL_04573	2.A.3.10.21	4.63636	1	4.97938	1.83916	151.565	47.43	2e-133	470
PCL_01715	2.A.1.2.31	2.1525	1	4.93703	0	1.63042	31.05	2e-60	228
PCL_00893	2.A.1.14.17	3.09991	1	4.85903	0.0239865	3.57077	29.79	1e-55	212
PCL_06908	2.A.1.12.2	2.02925	1	4.81838	0	0.689184	36.7	4e-89	325
PCL_05704	2.A.3.8.4	4.27689	1	4.8024	0.614027	45.5346	48.66	5e-149	523
PCL_00567	3.A.1.208.3	4.57136	1	4.77412	2.05765	145.964	33.7	0	822
PCL_12886	2.A.1.2.35	4.18831	1	4.77049	0.574444	41.9713	32.14	1e-67	252
PCL_09856	3.A.1.205.4	4.3728	1	4.69289	0.645456	43.5412	48.91	0	1432
PCL_12224	2.A.1.14.8	3.72974	1	4.68534	0.265905	19.2511	30.9	5e-37	150
PCL_06378	3.A.1.120.6	4.5483	1	4.64807	12.6522	820.041	29.02	3e-34	142
PCL_06724	2.A.1.13.4	1.84662	1	4.6433	0	1.63357	22.92	1e-31	132
PCL_06794	2.A.1.14.11	1.66536	1	4.47046	0	1.41678	33.19	1e-73	271
PCL_04915	2.A.1.54.1	2.82255	1	4.46169	0.0534409	4.5341	21.94	0.001	39.7
PCL_03720	2.A.1.3.35	4.25991	1	4.41789	9.1256	504.931	32.51	4e-45	177
PCL_03399	2.A.7.12.9	2.76761	1	4.40792	0.0330014	2.69688	32.49	7e-15	77.4
PCL_06315	2.A.1.2.6	4.07446	1	4.33593	2.49798	131.12	26.51	2e-40	162
PCL_12227	2.A.1.14.4	3.48052	1	4.30801	0.260945	14.3556	27.42	3e-56	214
PCL_11236	2.A.17.2.1	1.42587	1	4.24369	0	0.88673	44	9e-119	422
PCL_00894	2.A.1.1.11	3.45199	1	4.2107	0.337636	17.1994	26.21	1e-42	169
PCL_12276	2.A.1.14.4	3.59365	1	4.17866	0.264989	12.8427	29.92	1e-59	226
PCL_01463	2.A.1.1.69	2.38818	1	4.16483	0.0078194	0.716333	31.95	2e-70	263
PCL_11556	2.A.18.4.1	2.59727	1	4.14031	0.0525001	3.16991	22.29	4e-18	87.8
PCL_03858	2.A.1.1.10	3.42	1	4.13573	0.37854	18.1735	38.1	9e-102	365
PCL_02401	2.A.3.4.2	1.28941	1	4.11537	0	0.971837	29.5	1e-47	185
PCL_00977	2.A.1.3.27	2.78168	1	4.10575	0.127219	6.57771	26.7	7e-39	156
PCL_10210	2.A.1.1.38	3.10773	1	4.06992	0.248953	11.7567	41.42	2e-106	381
PCL_04572	2.A.1.2.33	1.13872	1	3.9745	0	0.817834	29.47	6e-61	229
PCL_01447	2.A.1.1.7	3.40607	1	3.9426	0.734813	30.0419	26.94	1e-58	222
PCL_06150	2.A.1.14.11	3.37595	1	3.85264	0.505943	19.3041	25.74	3e-51	199
PCL_11111	3.A.1.205.4	3.5764	1	3.82627	1.43948	53.0358	47.36	0	1421
PCL_06853	2.A.1.1.58	3.52258	1	3.82441	1.86538	68.8274	54.29	5e-155	543
PCL_12563	2.A.67.1.2	3.41783	1	3.80682	0.567469	20.8084	40.38	0	635
PCL_04735	2.A.1.7.2	3.35037	1	3.80401	1.13169	41.6512	30.16	1e-07	53.1
PCL_02767	2.A.1.3.34	3.42889	1	3.70511	2.81283	95.4092	30.93	7e-33	136
PCL_08753	2.A.3.4.1	2.40931	1	3.6891	0.16726	6.34298	31.04	6e-65	243
PCL_07589	3.A.1.1.5	2.45056	1	3.68408	0.231163	8.60308	28.4	0.13	32.3
PCL_04067	2.A.18.9.1	3.02764	1	3.67135	0.388282	13.3389	34.69	0.49	31.6
PCL_03071	2.A.3.10.22	3.48767	1	3.65601	8.43514	275.308	51.66	6e-133	469
PCL_09742	2.A.1.2.41	2.98496	1	3.62906	0.323875	10.8045	27.15	7e-05	44.3
PCL_01511	2.A.20.2.1	3.16224	1	3.59688	1.01312	32.2372	49.83	5e-165	576
PCL_00942	2.A.1.2.31	0.728477	1	3.59599	0	0.701133	34.32	3e-64	240
PCL_06207	2.A.1.1.39	3.30174	1	3.57746	1.35793	42.1564	46.44	1e-132	469
PCL_05449	2.A.3.10.21	2.60587	1	3.57581	0.1796	6.01693	46.71	2e-128	454
PCL_01940	2.A.1.24.1	3.18397	1	3.56132	1.609	49.7148	26.35	2e-12	68.6
PCL_02668	2.A.1.1.9	1.86321	1	3.5304	0.0455964	2.01734	29.34	5e-56	213
PCL_13048	2.A.1.2.35	3.24964	1	3.50857	3.27513	96.8504	31.27	4e-65	244
PCL_04191	3.A.1.201.11	3.12801	1	3.45824	0.897518	25.7331	39.53	0	828
PCL_11660	2.A.1.14.17	2.47603	1	3.44843	0.234434	7.18841	27.6	2e-42	168
PCL_12496	2.A.1.1.9	1.75445	1	3.42607	0.046362	1.90642	36.25	3e-92	333
PCL_04230	1.A.35.5.1	1.67711	1	3.35207	0.060907	2.3777	25.61	5e-28	120
PCL_06279	2.A.1.14.8	1.52038	1	3.33296	0.0248998	1.27014	28.9	7e-23	103
PCL_00730	2.A.7.9.1	2.80579	1	3.29678	1.2305	31.9618	23.18	9e-08	52.8
PCL_12273	2.A.1.1.39	2.67992	1	3.29244	0.577371	15.1706	45.16	7e-132	465
PCL_06222	2.A.1.13.4	2.20783	1	3.28495	0.281109	7.75496	28.57	2e-46	181
PCL_08746	2.A.18.4.2	0.372012	1	3.27406	0	0.478293	25.93	5e-08	54.7
PCL_00370	2.A.3.10.19	2.55752	1	3.26454	0.388957	10.1678	49.8	3e-143	503
PCL_06633	2.A.1.12.2	3.01247	1	3.23509	2.7821	67.9497	39.41	9e-66	246
PCL_06524	2.A.1.2.40	2.28315	1	3.18342	0.261579	6.62619	25.68	2e-35	145
PCL_10584	2.A.67.1.6	1.92326	1	3.17023	0.0660905	1.72004	26.62	3e-59	225
PCL_03043	2.A.1.1.10	2.88902	1	3.16929	1.38957	32.511	42.83	1e-119	426
PCL_02895	2.A.1.9.2	2.65418	1	3.16359	0.729754	17.3129	31.96	7e-65	243
PCL_04102	2.A.1.9.1	1.32475	1	3.14853	0.0208124	0.931645	30.66	4e-64	240
PCL_01742	2.A.3.4.2	1.32475	1	3.14853	0.0135644	0.607196	33.33	4e-70	261
PCL_02102	2.A.67.1.5	2.6793	1	3.12912	0.460527	10.6047	39	3e-175	611
PCL_06583	2.A.1.14.11	2.47735	1	3.10324	0.62385	14.3959	29.2	1e-50	195
PCL_12500	2.A.1.14.11	2.6049	1	3.09768	0.488892	11.0603	28.23	1e-58	223
PCL_04522	2.A.1.1.7	1.60584	1	3.09509	0.0992018	2.71086	28.31	1e-45	178
PCL_12452	2.A.1.25.1	2.82559	1	3.06272	2.24341	48.6488	38.88	6e-83	304
PCL_02610	2.A.18.4.1	2.36717	1	3.06066	0.493882	11.1758	26.22	1e-44	175
PCL_09061	3.A.1.205.7	2.66727	1	3.02961	0.653518	13.9467	43.18	0	1147
PCL_11224	2.A.3.4.2	1.53301	1	3.02538	0.0396965	1.03312	31.08	3e-48	188
PCL_02166	2.A.1.14.11	0.0743301	1	3.01103	0	0.480938	29.8	2e-63	238
PCL_11978	2.A.1.14.4	0.0743301	1	3.01103	0	0.227344	31.41	1e-63	239
PCL_04597	2.A.1.1.9	1.50282	1	2.99653	0.0405384	1.03393	33.21	2e-84	309
PCL_00885	2.A.1.2.33	1.13872	1	2.9745	0.0224278	0.887217	25.04	2e-46	181
PCL_12170	2.A.1.13.4	1.36961	1	2.95589	0.077174	2.03527	23.18	3e-22	101
PCL_12217	2.A.18.4.2	2.73639	1	2.95182	3.54365	71.0945	67.77	4e-171	596
PCL_11662	2.A.1.3.1	2.66544	1	2.92841	1.90597	37.699	26.58	4e-31	131
PCL_07988	3.A.1.201.11	2.83211	1	2.90435	20.4512	395.622	63.5	0	1734
PCL_11615	2.A.1.16.1	2.69218	1	2.86608	4.49518	84.8596	44.83	4e-140	494
PCL_02743	2.A.1.1.40	1.2674	1	2.85903	0.022148	0.54567	26.47	2e-52	203
PCL_06271	2.A.41.2.7	2.71589	1	2.84874	11.9104	221.918	44.5	1e-149	525
PCL_03336	2.A.1.1.11	2.16214	1	2.81659	0.370394	7.0282	26.4	1e-39	159
PCL_04080	2.A.3.10.2	1.59273	1	2.81012	0.142452	2.85058	52.43	6e-149	522
PCL_09453	1.A.11.3.1	2.6145	1	2.80529	5.11229	92.5752	50.96	2e-135	478
PCL_11410	2.a.1.3.27	2.56129	1	2.80141	1.57154	28.4342	29.49	3e-42	169
PCL_04998	2.A.1.1.11	2.34501	1	2.7525	1.42065	25.0947	34.82	2e-82	301
PCL_04893	2.A.1.1.9	1.31794	1	2.74799	0.10004	2.06205	45.97	6e-144	505
PCL_10823	2.A.51.1.4	1.2355	1	2.74221	0.0950288	2.028	26.09	4e-08	54.3
PCL_00990	2.A.1.13.4	0.878491	1	2.7335	0.026606	0.886317	22.43	4e-15	77.4
PCL_03949	2.A.1.3.34	0.878491	1	2.7335	0.0158685	0.528621	31.06	7e-38	154
PCL_12461	2.A.1.2.38	1.94791	1	2.72802	0.41509	7.54764	26.03	7e-20	93.2
PCL_11820	2.A.7.9.1	2.23729	1	2.72353	1.3192	22.995	22.9	6e-10	60.1
PCL_04536	2.A.3.10.17	2.07909	1	2.72252	0.511226	9.07048	42.6	3e-119	423
PCL_02543	2.A.52.1.3	1.84094	1	2.69553	0.395895	7.1014	48.14	9e-85	308
PCL_06992	2.A.1.14.11	1.08716	1	2.6891	0.0753032	1.64623	26.36	3e-36	147
PCL_08142	1.A.26.1.1	2.18011	1	2.67223	0.38627	6.50086	27.57	1e-11	67.8
PCL_03769	2.A.1.14.11	1.90181	1	2.63812	0.403102	6.83762	27.8	5e-55	210
PCL_05367	3.A.5.9.1	1.97545	1	2.63314	0.726996	12.1435	44.44	0.47	30.4
PCL_01933	2.A.1.14.4	1.89903	1	2.60079	0.143948	2.3661	35.5	6e-78	288
PCL_01810	3.A.1.205.7	2.31664	1	2.57927	0.913438	14.1809	41.11	0	1081
PCL_04550	2.A.18.4.1	2.36697	1	2.57434	4.05935	62.665	53.63	4e-142	499
PCL_02009	2.A.1.14.20	0.961949	1	2.57174	0.0680202	1.369	29.18	4e-53	203
PCL_01108	2.A.1.3.1	2.0839	1	2.56214	1.08991	16.9689	35.07	7e-76	279
PCL_02117	2.A.67.1.5	1.03927	1	2.557	0.064798	1.21421	36.5	2e-138	487
PCL_10744	2.A.3.4.2	1.68814	1	2.54708	0.237887	3.84802	61.47	2e-167	584
PCL_09786	2.A.53.1.2	1.91591	1	2.53941	0.281109	4.3779	30.14	2e-71	266
PCL_04842	2.A.1.2.17	2.28066	1	2.50513	5.31146	78.2006	33.52	4e-81	296
PCL_11874	2.A.1.1.67	0.767412	1	2.49646	0.0464487	0.991257	23.99	7e-39	156
PCL_10581	2.A.1.7.3	0.881271	1	2.49646	0.048662	0.928731	22.37	9e-08	53.9
PCL_10702	2.A.3.1.2	2.22669	1	2.48537	3.93734	57.2612	44.94	2e-114	407
PCL_01193	2.A.1.3.1	2.00752	1	2.46034	1.03373	14.9604	25.4	5e-35	144
PCL_12460	2.A.1.1.38	1.13282	1	2.45729	0.159881	2.56792	28.18	2e-43	172
PCL_08719	3.A.1.208.8	0.82487	1	2.44399	0.0243151	0.447188	28.8	1e-144	509
PCL_03696	2.A.1.2.17	2.18137	1	2.44111	1.16069	16.3704	34.38	1e-74	277
PCL_03382	2.A.1.1.9	1.5659	1	2.42864	0.308844	4.6001	26.5	5e-45	177
PCL_06327	2.A.1.2.17	1.98027	1	2.40426	1.35005	18.747	32.17	1e-59	225
PCL_05727	2.A.1.19.17	1.94655	1	2.40017	0.922381	12.8029	24.15	6e-17	84.3
PCL_08052	2.A.1.2.33	0.610282	1	2.35207	0.0477885	0.920353	28.83	6e-19	90.1
PCL_10914	2.A.1.58.1	1.99036	1	2.34265	2.19559	29.0641	40.05	6e-93	336
PCL_02136	2.A.1.14.11	1.7983	1	2.3314	0.472834	6.30327	31.76	2e-64	242
PCL_05709	2.A.1.14.11	1.9809	1	2.32259	2.27228	29.6441	29.26	2e-60	228
PCL_11337	2.A.38.2.5	0.787428	1	2.32137	0.0604624	0.959874	31.76	1e-100	362
PCL_12790	2.A.1.2.39	2.11648	1	2.27866	6.20551	77.929	26.33	7e-16	80.9
PCL_10181	2.A.1.22.1	0.372012	1	2.27406	0.0245069	0.586781	21.8	2e-09	58.9
PCL_08181	2.A.67.1.2	0.993738	1	2.23754	0.133762	1.79477	44.06	0	701
PCL_09172	2.A.1.14.11	1.29708	1	2.22707	0.291781	3.79688	25.49	4e-44	174
PCL_11081	2.A.1.13.4	1.57111	1	2.18095	0.402249	4.8699	31.68	9e-49	190
PCL_12772	2.A.1.1.9	1.40153	1	2.17149	0.370205	4.55243	32.87	1e-72	268
PCL_03432	2.A.1.1.57	2.10459	1	2.15375	112.906	1297.83	63.87	0	688
PCL_12451	2.A.1.13.4	1.70541	1	2.13315	1.50529	17.3171	30.8	2e-71	264
PCL_07175	2.A.53.7.1	1.59768	1	2.10414	0.46995	5.33377	42.68	0	662
PCL_03989	2.A.1.1.10	1.95954	1	2.09177	15.1961	167.523	43.19	5e-123	436
PCL_01630	8.A.5.1.1	1.92626	1	2.08492	5.22163	57.3253	26.92	8e-23	104
