# Supplementary material for: Genome and Transcriptome Sequences Reveal the Specific Parasitism of the Nematophagous Purpureocillium lilacinum 36-1
Source: Front Microbiol. 2016 Jul 19;7:1084. doi: 10.3389/fmicb.2016.01084 (PMC4949223; doi:10.3389/fmicb.2016.01084)
Supplement: Supplementary file 10 [file Table10.XLSX]

## Sheet: Table S10
Table S10: The up-regulation signal transduction genes in P. lilacinum 36-1 infection nematode-eggs at the early stage
Class	Genes	Description	Fold
G-protein coupled receptors	PCL_12499	PTH11-like	6.8
	PCL_01027		5.3
	PCL_06862		4.7
	PCL_11559		4.7
	PCL_12071		4.4
Protein kinases	PCL_07599	Serine/threonine-protein kinase	4.2
	PCL_11315		3.8
	PCL_07929		3.3
	PCL_12446		4
	PCL_08025		3.3
	PCL_00312		3.5
	PCL_07427	Casein kinase	3.2
	PCL_07809	Calcium/calmodulin-dependent protein kinase	2.6
	PCL_03033	Adenylate kinase	2.4
PLC	PCL_07510	phosphatidylinositol-specific phospholipase C	3
	PCL_07808		2.6
Small GTPase	PCL_03136	Rho type	5.1
	PCL_01169	Rho type	3.4
	PCL_02097	Ras type	3.1
	PCL_12474	Ras type	2.8
	PCL_05689	Arf type	2.8
	PCL_04775	Ran GTPase-activating protein	2.3
G protein	PCL_11517	G protein alpha subunit	3.1
	PCL_06420	G protein alpha subunit	2.9
Transcription factor	PCL_00427	bZIP transcription factor	4.2
	PCL_12818	bZIP transcription factor	4.9
	PCL_04546	bZIP transcription factor	6
	PCL_01280	bZIP transcription factor	3
	PCL_07248	bZIP transcription factor	3.2
	PCL_05632	bZIP transcription factor	3.5
	PCL_11074	Zinc finger, C2H2	5.2
	PCL_08254	Zinc finger, C2H2	5.6
	PCL_02619	Zn(2)-C6 fungal-type DNA-binding domain	4.9
	PCL_03948	Zn(2)-C6 fungal-type DNA-binding domain	4.9
	PCL_10732	Zn(2)-C6 fungal-type DNA-binding domain	5.6
	PCL_12024	Zn(2)-C6 fungal-type DNA-binding domain	6.4
	PCL_11521	Zn(2)-C6 fungal-type DNA-binding domain	7.4
	PCL_04051	Zn(2)-C6 fungal-type DNA-binding domain	7.7
