# Supplementary material for: Genome and Transcriptome Sequences Reveal the Specific Parasitism of the Nematophagous Purpureocillium lilacinum 36-1
Source: Front Microbiol. 2016 Jul 19;7:1084. doi: 10.3389/fmicb.2016.01084 (PMC4949223; doi:10.3389/fmicb.2016.01084)
Supplement: Supplementary file 12 [file Table12.XLSX]

## Sheet: Table S12
Table S12: The up-regulated effector-like genes (log2 fold change > 2) of P. lilacinum 36-1 during infection
GeneSymbol	Description	GFOLD.0.01.	E.FDR	log2fdc	X1stRPKM	X2ndRPKM
PCL_06889	NA	8.58996	1	11.3214	0	1001.33
PCL_05664	NA	7.80524	1	9.41447	0.130105	343.887
PCL_01597	NA	6.66233	1	9.3956	0	263.426
PCL_04008	hypothetical protein	5.41192	1	8.14853	0	52.5612
PCL_06856	NA	6.59664	1	7.95511	0.234434	180.256
PCL_10888	Guanine-specific ribonuclease	5.11609	1	7.85401	0	41.8733
PCL_11847	expressed protein	5.76301	1	7.12303	0.363305	156.88
PCL_05604	NA	5.2418	1	6.97912	0.0881207	57.3346
PCL_01005	NA	5.6386	1	6.45587	1.06267	259.375
PCL_11955	Fungal chitosanase	3.50669	1	6.25896	0	10.3587
PCL_10627	muramidase	4.77616	1	6.20952	0.210594	50.259
PCL_00701	NA	4.42517	1	6.04372	0.103975	26.5188
PCL_04564	Blastomyces yeast-phase-specific protein	4.61619	1	5.6643	0.801614	115.411
PCL_08257	Peptidase G1	4.81126	1	5.50254	0.891037	110.074
PCL_05567	Cupin	4.99317	1	5.48003	2.10594	248.774
PCL_06888	NA	2.68907	1	5.45729	0	16.0569
PCL_11619	hypothetical protein	3.56456	1	5.00742	0.301213	31.2001
PCL_00353	Protein of unknown function DUF4360	1.98571	1	4.77656	0	4.42155
PCL_12199	hypothetical protein	3.84224	1	4.72168	1.79639	132.464
PCL_02150	Cell wall protein	4.46239	1	4.68421	16.3647	1091.56
PCL_01548	Guanine-specific ribonuclease	3.04997	1	4.36959	0.564774	35.0805
PCL_01716	Extracellular metalloprotease	2.51615	1	4.28901	0.0443751	4.43475
PCL_11875	uncharacterized protein	1.45808	1	4.27406	0	5.84549
PCL_04068	Hydrophobin	2.45552	1	4.00198	0.414167	22.7076
PCL_05703	hypothetical protein	3.7696	1	3.93579	26.9548	1068
PCL_00348	Major allergen	2.05053	1	3.83885	0.0806819	5.87941
PCL_01382	NA	2.90586	1	3.73973	1.64822	61.1098
PCL_04808	Extracellular membrane protein, CFEM domain	3.26594	1	3.63131	5.56236	180.259
PCL_06909	Acetylxylan esterase	0.61908	1	3.49646	0	1.46738
PCL_04692	Extracellular metalloprotease	0.561138	1	3.44399	0	1.18835
PCL_08970	Beta/gamma crystallin	1.6375	1	3.44399	0.119471	6.59172
PCL_05659	Major allergen	1.75445	1	3.42607	0.0833894	3.429
PCL_05807	hypothetical protein	1.52038	1	3.33296	0.046362	2.36493
PCL_01633	Protein SnodProt1	2.87185	1	3.19262	9.20703	219.425
PCL_06748	Rodlet protein	1.4863	1	3.17023	0.186842	6.41872
PCL_05999	Clock-controlled protein 6	3.11897	1	3.16587	452.271	10485.2
PCL_10748	predicted protein	0.154642	1	3.08142	0	2.12044
PCL_05360	Protein of unknown function DUF3455	2.42713	1	3.05367	1.20729	26.9167
PCL_12454	adhesin-like protein 2	2.64406	1	3.00657	3.56273	74.8265
PCL_02790	Extracellular membrane protein, CFEM domain	1.13872	1	2.9745	0.0542577	2.14637
PCL_06849	trypsin-like protein	1.36961	1	2.95589	0.150303	3.96386
PCL_06289	Allergen Asp	2.64975	1	2.76773	35.7219	629.039
PCL_04045	NA	1.45545	1	2.71885	0.531552	10.0987
PCL_12832	Extracellular membrane protein, CFEM domain	2.6419	1	2.70648	228.604	3855.13
PCL_12477	structural toxin protein RtxA	0.830195	1	2.6891	0.108991	3.51733
PCL_06703	NA	1.17463	1	2.61193	0.283676	5.31563
PCL_04681	NA	0.729689	1	2.46169	0.299398	6.23359
PCL_12349	Killer toxin, Kp4	0.690968	1	2.42607	0.175	3.55249
PCL_04934	Apple-like protein	0.651187	1	2.38954	0.0831105	1.64387
PCL_12840	hypothetical protein	0.600916	1	2.14853	0.182721	2.56792
PCL_11216	hypothetical protein	1.66474	1	2.11853	4.36555	49.8161
PCL_12754	prp 4 CRoW domain-containing protein	1.7671	1	2.034	7.8757	83.77
